# Supplementary material for: The Impacts of Using Smartphone Dating Applications on Sexual Risk Behaviours in College Students in Hong Kong
Source: PLoS One. 2016 Nov 9;11(11):e0165394. doi: 10.1371/journal.pone.0165394 (PMC5102411; doi:10.1371/journal.pone.0165394)
Supplement: S1 Instrument — (PDF) [file pone.0165394.s001.pdf]

## S1 Instrument

### Use of dating apps

- Do you use dating applications (apps)?  
*Yes/ No*
- How long have you started using dating app(s)?  
*< 1 month/ 1-2 months/ 3-12 months/ >12 months*

### Sexual behaviours

- Have you ever had sexual intercourse?  
*Yes/ No*
- *Have you done any sexual touching?*  
*Yes with girls/ Yes with boys/ Yes with both boys and girls/ No*
- How old were you when you had sexual intercourse for the first time?  
*Age:*
- During your life, with how many people have you had sexual intercourse?  
*Number:*
- During the past 3 months, with how many people did you have sexual intercourse?  
*Number:*
- During the past 1 month, with how many people did you have sexual intercourse?  
*Number:*
- During your life, with how many people have you had unprotected sexual intercourse?  
*Number:*
- During your life, how often do you/ your partner(s) use condom when you have sexual intercourse?  
*Never/ Sometimes (less than half of the occasions)/ Half of the occasions/ Frequently (more than half of the occasions)/ Always (100%)*
- The last time you had sexual intercourse, did you or your partner use a condom?  
*Yes/ No*

## Sociodemographics

- Age
- Gender  
*Male/ Female*
- Sexual orientation  
  
Attracted to the opposite sex/ Attracted to both the opposite and the same sex/ Attracted to the same sex
- Relationship status  
*Currently in a relationship/ Not Currently in a relationship*
- Occupational status  
*Students/ Others (employed, self-employed, employer, seeking job, retired)*
- Individual monthly income  
*<\$5,000/ ≥\$5,000*
- Do you smoke?  
*Yes/ No*
- Do you drink?  
*Yes/ No*
